# Supplementary material for: Impact of Arsenite on the Bacterial Community Structure and Diversity in Soil
Source: PubMed Central journal article supplement (PMC4791115; doi:10.1264/jsme2.me15093), 2016-02-20
Supplement: 31_41_s1.pdf [file 31_41_s1.pdf]

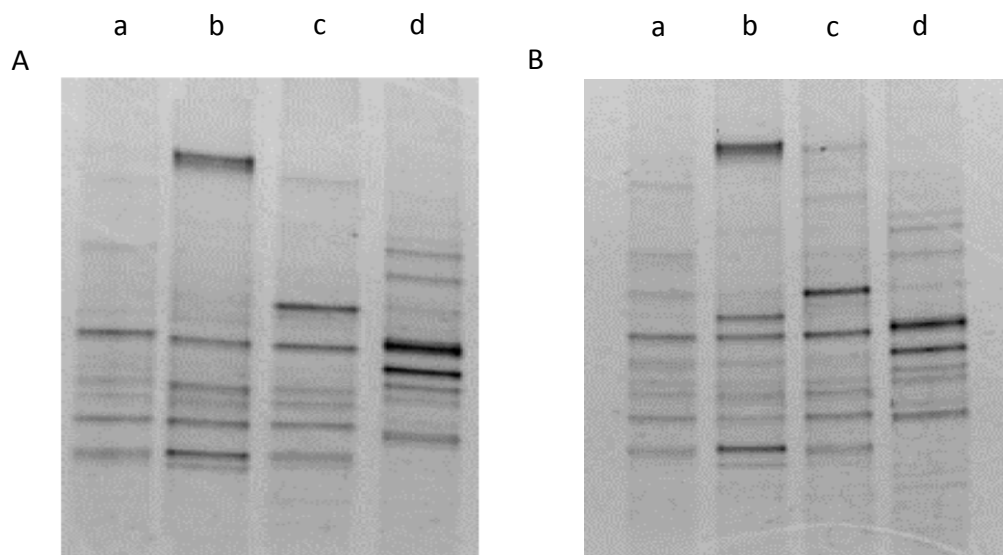

**Fig. S1.** PCR-DGGE analysis of the soil slurries spiked with 0 (lane a), 50 (lane b), 500 (lane c), and 5,000  $\mu\text{M}$  As(III) (lane d) incubated for 11 days (A) and 22 days (B).

**Table S1.** 16S rRNA genes of As(III)-resistant bacteria isolated from the slurry incubated with 5,000  $\mu$ M As(III)

| Isolates | Length<br>(bases) | Most closely related organisms in<br>GenBank database | Accession no. | Similarity<br>(%) |
|----------|-------------------|-------------------------------------------------------|---------------|-------------------|
| 1        | 136               | <i>Bacillus thioeparans</i>                           | KM374719      | 100               |
| 2        | 140               | <i>Bacillus niacini</i>                               | AY167817      | 99                |
| 3        | 134               | <i>Bacillus niacini</i>                               | AY167817      | 99                |
| 4        | 138               | <i>Bacillus thioeparans</i>                           | KM374719      | 93                |
| 5        | 134               | <i>Bacillus niacini</i>                               | AY167817      | 100               |
| 6        | 134               | <i>Bacillus niacini</i>                               | AY167817      | 99                |
| 7        | 134               | <i>Bacillus licheniformis</i>                         | KM505054      | 99                |
| 8        | 128               | <i>Rhodococcus erythropolis</i>                       | GU944896      | 98                |
| 9        | 140               | <i>Bacillus niacini</i>                               | AY167817      | 99                |
| 10       | 141               | <i>Bacillus niacini</i>                               | AY167817      | 98                |
| 11       | 138               | <i>Bacillus niacini</i>                               | AY167817      | 99                |
| 12       | 138               | <i>Bacillus niacini</i>                               | AY167817      | 99                |
| 13       | 148               | <i>Bacillus niacini</i>                               | AY167817      | 97                |
| 14       | 126               | <i>Rhodococcus equi</i>                               | AB999844      | 98                |
| 15       | 135               | <i>Bacillus niacini</i>                               | AY167817      | 99                |
| 16       | 132               | <i>Bacillus niacini</i>                               | AY167817      | 98                |
| 17       | 133               | <i>Bacillus niacini</i>                               | AY167817      | 99                |
| 18       | 138               | <i>Bacillus niacini</i>                               | AY167817      | 99                |
